# Supplementary material
Source: publisher site journal article supplement (https://www.spandidos-publications.com/2971/downloadSupplementary)
Supplement: Supplementary file 1 [file downloadSupplementary]

## Sheet: UP-regulated
The enriched signaling pathways of up-regulated-DEGs in CVSMCs using the KEGG PATHWAY and Reactome online dataset
Category	Term	Count	%	P-value	Genes	List Total	Pop Hits	Pop Total	Fold Enrichment	Bonferroni	Benjamini	FDR
KEGG_PATHWAY	hsa00982:Drug metabolism - cytochrome P450	6	4.22535	0.000455979	GSTM2, MAOA, AOX1, GSTT1, ADH1A, MGST1	67	68	6879	9.05926	0.0648462	0.0648462	0.541265
REACTOME_PATHWAY	R-HSA-186797:R-HSA-186797	4	2.8169	0.00281976	COL4A1, PDGFRB, PDGFD, THBS1	82	32	9075	13.8338	0.437882	0.437882	3.48845
KEGG_PATHWAY	hsa00980:Metabolism of xenobiotics by cytochrome P450	5	3.52113	0.00537731	GSTM2, HSD11B1, GSTT1, ADH1A, MGST1	67	74	6879	6.93727	0.547333	0.327194	6.21471
KEGG_PATHWAY	hsa05204:Chemical carcinogenesis	5	3.52113	0.00708168	GSTM2, HSD11B1, GSTT1, ADH1A, MGST1	67	80	6879	6.41698	0.648206	0.294068	8.10938
KEGG_PATHWAY	hsa04978:Mineral absorption	4	2.8169	0.00844054	MT1M, CYBRD1, SLC40A1, MT1X	67	44	6879	9.33379	0.712354	0.267657	9.59476
REACTOME_PATHWAY	R-HSA-156590:R-HSA-156590	3	2.11268	0.0191249	GSTM2, GSTT1, MGST1	82	24	9075	13.8338	0.980538	0.860492	21.5585
KEGG_PATHWAY	hsa04270:Vascular smooth muscle contraction	5	3.52113	0.025531	ACTA2, ADRA1B, RAMP1, PPP1R14A, MYL9	67	117	6879	4.38768	0.977669	0.532502	26.491
REACTOME_PATHWAY	R-HSA-3000178:R-HSA-3000178	4	2.8169	0.0292146	LAMA2, COL4A1, LUM, DCN	82	75	9075	5.90244	0.997639	0.866838	31.1221
REACTOME_PATHWAY	R-HSA-216083:R-HSA-216083	4	2.8169	0.041321	COL4A1, LUM, THBS1, COL8A1	82	86	9075	5.14748	0.999817	0.883766	41.1769
KEGG_PATHWAY	hsa00350:Tyrosine metabolism	3	2.11268	0.0440325	MAOA, AOX1, ADH1A	67	35	6879	8.80043	0.998666	0.668215	41.484
KEGG_PATHWAY	hsa04510:Focal adhesion	6	4.22535	0.0470022	LAMA2, COL4A1, PDGFRB, PDGFD, THBS1, MYL9	67	206	6879	2.99044	0.999156	0.636144	43.6109
KEGG_PATHWAY	hsa00380:Tryptophan metabolism	3	2.11268	0.0559972	MAOA, AOX1, INMT	67	40	6879	7.70037	0.999791	0.653156	49.6286
KEGG_PATHWAY	hsa05202:Transcriptional misregulation in cancer	5	3.52113	0.0758053	CEBPB, NUPR1, FOXO1, ZBTB16, CD14	67	167	6879	3.074	0.999991	0.724067	60.8629
REACTOME_PATHWAY	R-HSA-159763:R-HSA-159763	2	1.40845	0.0775545	PROS1, GAS6	82	9	9075	24.5935	1	0.962882	63.7637
KEGG_PATHWAY	hsa00480:Glutathione metabolism	3	2.11268	0.0856539	GSTM2, GSTT1, MGST1	67	51	6879	6.03951	0.999998	0.731882	65.5476
REACTOME_PATHWAY	R-HSA-159782:R-HSA-159782	2	1.40845	0.0857961	PROS1, GAS6	82	10	9075	22.1341	1	0.952634	67.6308
REACTOME_PATHWAY	R-HSA-159740:R-HSA-159740	2	1.40845	0.0857961	PROS1, GAS6	82	10	9075	22.1341	1	0.952634	67.6308
REACTOME_PATHWAY	R-HSA-419812:R-HSA-419812	2	1.40845	0.0857961	ADM, RAMP1	82	10	9075	22.1341	1	0.952634	67.6308
REACTOME_PATHWAY	R-HSA-1234158:R-HSA-1234158	2	1.40845	0.0857961	EPAS1, CITED2	82	10	9075	22.1341	1	0.952634	67.6308
REACTOME_PATHWAY	R-HSA-5661231:R-HSA-5661231	2	1.40845	0.0939649	MT1M, MT1X	82	11	9075	20.122	1	0.943625	71.0855

## Sheet: Down-regulated
The enriched signaling pathways of down-regulated-DEGs in CVSMCs using the KEGG PATHWAY and Reactome online dataset
Category	Term	Count	%	PValue	Genes	List Total	Pop Hits	Pop Total	Fold Enrichment	Bonferroni	Benjamini	FDR
KEGG_PATHWAY	hsa04110:Cell cycle	16	9.14286	1.8189e-11	CDK1, TTK, CDC20, PTTG1, MCM2, MCM3, MCM5, MCM6, CCNB1, CDC45, CCNB2, MCM7, MAD2L1, BUB1, PCNA, CCNA2	86	124	6879	10.3211	2.65559e-09	2.65559e-09	2.16191e-08
KEGG_PATHWAY	hsa03030:DNA replication	9	5.14286	8.88346e-09	RFC4, MCM7, PCNA, MCM2, MCM3, RNASEH2A, MCM5, FEN1, MCM6	86	36	6879	19.9971	1.29698e-06	6.48492e-07	1.05587e-05
KEGG_PATHWAY	hsa04114:Oocyte meiosis	9	5.14286	6.11896e-05	CCNB1, CDK1, MAD2L1, CCNB2, BUB1, FBXO5, AURKA, CDC20, PTTG1	86	111	6879	6.48554	0.00889416	0.00297355	0.0727045
KEGG_PATHWAY	hsa04914:Progesterone-mediated oocyte maturation	6	3.42857	0.00427658	CCNB1, CDK1, MAD2L1, CCNB2, BUB1, CCNA2	86	87	6879	5.51644	0.465124	0.144809	4.96639
KEGG_PATHWAY	hsa05323:Rheumatoid arthritis	5	2.85714	0.0230932	CCL2, CXCL8, IL1B, CXCL6, MMP1	86	88	6879	4.54479	0.966997	0.494512	24.2476
KEGG_PATHWAY	hsa04621:NOD-like receptor signaling pathway	4	2.28571	0.0315608	CXCL1, CCL2, CXCL8, IL1B	86	56	6879	5.71346	0.990741	0.541759	31.694
KEGG_PATHWAY	hsa05206:MicroRNAs in cancer	8	4.57143	0.0626134	KIF23, CYP1B1, CD44, SLC7A1, MMP16, STMN1, CDCA5, PLAU	86	286	6879	2.23744	0.999921	0.7404	53.6306
KEGG_PATHWAY	hsa05164:Influenza A	6	3.42857	0.0635522	CCL2, PRSS3, CXCL8, IL1B, IL33, KPNA2	86	174	6879	2.75822	0.999931	0.6983	54.1795
KEGG_PATHWAY	hsa04640:Hematopoietic cell lineage	4	2.28571	0.0922848	CD55, CD44, IL1B, ITGA2	86	87	6879	3.67763	0.999999	0.792103	68.3629
REACTOME_PATHWAY	R-HSA-2500257:R-HSA-2500257	21	12	2.91063e-17	CENPN, CDK1, CENPM, CENPF, NDC80, BIRC5, CDC20, AURKB, CENPK, SPC24, CCNB1, KIF2C, SPC25, CDCA8, MAD2L1, CCNB2, ZWINT, BUB1, SKA1, CDCA5, TUBB3	117	121	9075	13.4615	6.69446e-15	6.69446e-15	3.73155e-14
REACTOME_PATHWAY	R-HSA-68877:R-HSA-68877	17	9.71429	3.38041e-13	CENPN, CENPM, CENPF, NDC80, BIRC5, CDC20, AURKB, CENPK, SPC24, KIF2C, SPC25, CDCA8, MAD2L1, ZWINT, BUB1, SKA1, TUBB3	117	108	9075	12.2092	7.77545e-11	3.88772e-11	4.33409e-10
REACTOME_PATHWAY	R-HSA-2467813:R-HSA-2467813	20	11.4286	1.54902e-12	CENPN, CENPM, CENPF, NDC80, BIRC5, CDC20, PTTG1, AURKB, UBE2C, CENPK, SPC24, KIF2C, SPC25, CDCA8, MAD2L1, ZWINT, BUB1, SKA1, CDCA5, TUBB3	117	185	9075	8.38531	3.56266e-10	1.18755e-10	1.98586e-09
REACTOME_PATHWAY	R-HSA-5663220:R-HSA-5663220	17	9.71429	1.15326e-11	CENPN, CENPM, CENPF, NDC80, BIRC5, CDC20, AURKB, CENPK, SPC24, KIF2C, SPC25, CDCA8, MAD2L1, ZWINT, BUB1, SKA1, TUBB3	117	135	9075	9.76733	2.65251e-09	6.63128e-10	1.47854e-08
REACTOME_PATHWAY	R-HSA-176974:R-HSA-176974	7	4	3.3248e-09	GINS2, CDC45, MCM7, MCM2, MCM3, MCM5, MCM6	117	12	9075	45.2457	7.64705e-07	1.52941e-07	4.26254e-06
REACTOME_PATHWAY	R-HSA-176187:R-HSA-176187	8	4.57143	3.48488e-07	CDC45, RFC4, MCM7, MCM2, MCM3, MCM10, MCM5, MCM6	117	37	9075	16.7706	8.0149e-05	1.33586e-05	0.000446775
REACTOME_PATHWAY	R-HSA-69052:R-HSA-69052	5	2.85714	3.72829e-07	MCM7, MCM2, MCM3, MCM5, MCM6	117	6	9075	64.6368	8.57471e-05	1.225e-05	0.000477982
REACTOME_PATHWAY	R-HSA-69300:R-HSA-69300	6	3.42857	1.71313e-06	MCM7, MCM2, MCM3, MCM10, MCM5, MCM6	117	17	9075	27.3756	0.000393943	4.92513e-05	0.00219628
REACTOME_PATHWAY	R-HSA-68962:R-HSA-68962	7	4	2.64678e-06	CDC45, MCM7, MCM2, MCM3, MCM10, MCM5, MCM6	117	32	9075	16.9671	0.000608576	6.76378e-05	0.00339323
REACTOME_PATHWAY	R-HSA-176408:R-HSA-176408	6	3.42857	1.09548e-05	CCNB1, CDK1, FBXO5, CDC20, UBE2C, CCNA2	117	24	9075	19.391	0.00251644	0.000251929	0.0140436
REACTOME_PATHWAY	R-HSA-68867:R-HSA-68867	5	2.85714	3.10333e-05	MCM7, MCM2, MCM3, MCM5, MCM6	117	15	9075	25.8547	0.00711236	0.000648678	0.0397787
REACTOME_PATHWAY	R-HSA-176417:R-HSA-176417	4	2.28571	3.95797e-05	CCNB1, CDK1, FBXO5, CDC20	117	6	9075	51.7094	0.0090622	0.000758338	0.0507309
REACTOME_PATHWAY	R-HSA-113510:R-HSA-113510	5	2.85714	5.30497e-05	CDK1, TYMS, CDC45, PCNA, FBXO5	117	17	9075	22.813	0.0121276	0.000938156	0.0679906
REACTOME_PATHWAY	R-HSA-69205:R-HSA-69205	5	2.85714	5.30497e-05	CDK1, TYMS, CDC45, PCNA, FBXO5	117	17	9075	22.813	0.0121276	0.000938156	0.0679906
REACTOME_PATHWAY	R-HSA-983189:R-HSA-983189	7	4	0.000143791	KIF23, KIF2C, KIF11, KIF20B, RACGAP1, TUBB3, KIF20A	117	63	9075	8.61823	0.0325334	0.00235967	0.18419
REACTOME_PATHWAY	R-HSA-69273:R-HSA-69273	5	2.85714	0.000155193	CCNB1, CDK1, CCNB2, FOXM1, CCNA2	117	22	9075	17.6282	0.0350675	0.00237698	0.198782
REACTOME_PATHWAY	R-HSA-4615885:R-HSA-4615885	6	3.42857	0.00025424	CDCA8, PCNA, AURKA, BIRC5, AURKB, TOP2A	117	45	9075	10.3419	0.0568055	0.0036485	0.325458
REACTOME_PATHWAY	R-HSA-2514853:R-HSA-2514853	4	2.28571	0.000311602	CCNB1, CDK1, CCNB2, NCAPG	117	11	9075	28.2051	0.069171	0.00420758	0.398753
REACTOME_PATHWAY	R-HSA-606279:R-HSA-606279	7	4	0.000349816	CENPN, CENPM, HJURP, OIP5, H2AFZ, HIST1H4C, CENPK	117	74	9075	7.33714	0.0773189	0.00446067	0.447552
REACTOME_PATHWAY	R-HSA-156711:R-HSA-156711	4	2.28571	0.00100934	CCNB1, CCNB2, FOXM1, CENPF	117	16	9075	19.391	0.207264	0.01215	1.28632
REACTOME_PATHWAY	R-HSA-69478:R-HSA-69478	3	1.71429	0.00157965	CCNB1, CDK1, CCNB2	117	5	9075	46.5385	0.304836	0.0180161	2.00638
REACTOME_PATHWAY	R-HSA-68949:R-HSA-68949	6	3.42857	0.00208191	MCM7, MCM2, MCM3, CCNA2, MCM5, MCM6	117	71	9075	6.55471	0.380808	0.0225671	2.6365
REACTOME_PATHWAY	R-HSA-174048:R-HSA-174048	4	2.28571	0.0029908	CCNB1, CDK1, CDC20, UBE2C	117	23	9075	13.4894	0.497879	0.030829	3.76727
REACTOME_PATHWAY	R-HSA-2980767:R-HSA-2980767	3	1.71429	0.00326212	CCNB1, CDK1, CCNB2	117	7	9075	33.2418	0.528348	0.0321465	4.10248
REACTOME_PATHWAY	R-HSA-179409:R-HSA-179409	4	2.28571	0.00381274	MAD2L1, NEK2, CDC20, UBE2C	117	25	9075	12.4103	0.584638	0.0359466	4.77944
REACTOME_PATHWAY	R-HSA-1538133:R-HSA-1538133	4	2.28571	0.00381274	CDK1, PCNA, CCNA2, TOP2A	117	25	9075	12.4103	0.584638	0.0359466	4.77944
REACTOME_PATHWAY	R-HSA-2565942:R-HSA-2565942	6	3.42857	0.00527808	CCNB1, CDK1, PLK4, CCNB2, NEK2, AURKA	117	88	9075	5.28846	0.703934	0.0475207	6.5596
REACTOME_PATHWAY	R-HSA-162658:R-HSA-162658	3	1.71429	0.0133337	CCNB1, CDK1, CCNB2	117	14	9075	16.6209	0.954379	0.111966	15.81
REACTOME_PATHWAY	R-HSA-174178:R-HSA-174178	5	2.85714	0.0133858	AURKA, CDC20, PTTG1, AURKB, UBE2C	117	72	9075	5.3864	0.95493	0.108453	15.867
REACTOME_PATHWAY	R-HSA-174184:R-HSA-174184	5	2.85714	0.0133858	CDK1, MAD2L1, CDC20, UBE2C, CCNA2	117	72	9075	5.3864	0.95493	0.108453	15.867
REACTOME_PATHWAY	R-HSA-2132295:R-HSA-2132295	6	3.42857	0.0198742	KIF23, KIF2C, KIF11, RACGAP1, TUBB3, KIF20A	117	122	9075	3.81463	0.990119	0.152019	22.6912
REACTOME_PATHWAY	R-HSA-176412:R-HSA-176412	3	1.71429	0.0240377	CCNB1, CDK1, UBE2C	117	19	9075	12.247	0.996288	0.175496	26.7973
REACTOME_PATHWAY	R-HSA-141405:R-HSA-141405	2	1.14286	0.0254027	MAD2L1, CDC20	117	2	9075	77.5641	0.99731	0.179032	28.0991
REACTOME_PATHWAY	R-HSA-141430:R-HSA-141430	3	1.71429	0.0264886	MAD2L1, CDC20, UBE2C	117	20	9075	11.6346	0.997918	0.180596	29.1194
REACTOME_PATHWAY	R-HSA-176409:R-HSA-176409	3	1.71429	0.0264886	MAD2L1, CDC20, UBE2C	117	20	9075	11.6346	0.997918	0.180596	29.1194
REACTOME_PATHWAY	R-HSA-381426:R-HSA-381426	3	1.71429	0.029036	PAPPA, MMP1, IGFBP5	117	21	9075	11.0806	0.99886	0.190862	31.4609
REACTOME_PATHWAY	R-HSA-5651801:R-HSA-5651801	3	1.71429	0.029036	RFC4, PCNA, FEN1	117	21	9075	11.0806	0.99886	0.190862	31.4609
REACTOME_PATHWAY	R-HSA-170145:R-HSA-170145	2	1.14286	0.0378631	CDK1, CCNA2	117	3	9075	51.7094	0.999861	0.235872	39.0338
REACTOME_PATHWAY	R-HSA-380108:R-HSA-380108	4	2.28571	0.0394448	CXCL1, CCL2, CXCL8, CXCL6	117	59	9075	5.25858	0.999904	0.238327	40.3062
REACTOME_PATHWAY	R-HSA-380994:R-HSA-380994	3	1.71429	0.0401352	EXOSC9, CCL2, CXCL8	117	25	9075	9.30769	0.999919	0.235998	40.854
REACTOME_PATHWAY	R-HSA-351202:R-HSA-351202	2	1.14286	0.0501656	ODC1, SMS	117	4	9075	38.7821	0.999993	0.280228	48.3064
REACTOME_PATHWAY	R-HSA-68884:R-HSA-68884	2	1.14286	0.0501656	KIF23, KIF20A	117	4	9075	38.7821	0.999993	0.280228	48.3064
REACTOME_PATHWAY	R-HSA-2559582:R-HSA-2559582	5	2.85714	0.0521455	H2AFZ, CXCL8, HIST1H4C, UBE2C, CCNA2	117	110	9075	3.52564	0.999996	0.283162	49.671
REACTOME_PATHWAY	R-HSA-380320:R-HSA-380320	3	1.71429	0.0558581	CCNB1, CDK1, TUBB3	117	30	9075	7.75641	0.999998	0.293829	52.1406
REACTOME_PATHWAY	R-HSA-157881:R-HSA-157881	2	1.14286	0.0623121	CDK1, CCNB2	117	5	9075	31.0256	1	0.315749	56.1695
REACTOME_PATHWAY	R-HSA-5656169:R-HSA-5656169	3	1.71429	0.0626588	RFC4, PCNA, KIAA0101	117	32	9075	7.27163	1	0.310694	56.3768
REACTOME_PATHWAY	R-HSA-2299718:R-HSA-2299718	4	2.28571	0.0686852	CCNB1, CDK1, H2AFZ, HIST1H4C	117	74	9075	4.19265	1	0.329129	59.839
REACTOME_PATHWAY	R-HSA-3301854:R-HSA-3301854	3	1.71429	0.0733501	CCNB1, CDK1, CCNB2	117	35	9075	6.64835	1	0.341093	62.343
